# Supplementary material for: Facile and selective synthesis of zeolites L and W from a single-source heptanuclear aluminosilicate precursor
Source: Royal Society of Chemistry journal article supplement (doi:10.1039/d0ce00546k), 2020-01-01
Supplement: d0ce00546k1.pdf [file d0ce00546k1.pdf]

## Supporting Information for

# **Facile and selective synthesis of zeolites L and W from a single-source heptanuclear aluminosilicate precursor**

*Akira Imaizumi,<sup>a</sup> Akinobu Nakada,<sup>a</sup> Takeshi Matsumoto,<sup>b</sup> and Ho-Chol Chang<sup>a, \*</sup>*

<sup>a</sup> Department of Applied Chemistry, Faculty of Science and Engineering, Chuo University,  
1-13-27 Kasuga, Bunkyo-ku, Tokyo 112-8551, Japan.

<sup>b</sup> Precursory Research for Embryonic Science and Technology (PRESTO), Japan Science and  
Technology Agency (JST), 4-1-8 Honcho, Kawaguchi, Saitama 332-0012, Japan.

\* To whom correspondence should be addressed. E-mail: chang@kc.chuo-u.ac.jp

Phone: +81-3-3817-1897. Fax: +81-3-3817-1895.

## Contents

1. **Fig. S1** Spiro-7 unit in the MER-type zeolite structure.
2. **Fig. S2**  $^1\text{H}$  NMR spectra of  $\text{AlSi}_6$ .
3. **Fig. S3** PXRD pattern of  $\text{AlSi}_6$ .
4. **Fig. S4** IR spectra of the solids obtained from TG measurements of  $\text{AlSi}_6$ .
5. **Fig. S5** PXRD pattern of the sample obtained from heating  $\text{AlSi}_6$  to 800 °C.
6. **Fig. S6**  $^1\text{H}$  NMR spectrum of the products obtained from refluxing  $\text{AlSi}_6$  in the presence of HCl (12 eq.).
7. **Fig. S7** IR spectrum of the soluble products obtained from the hydrothermal treatment of  $\text{AlSi}_6$  at 150 °C in the presence of HCl (12 eq.).
8. **Fig. S8**  $^1\text{H}$  NMR spectra of the soluble products obtained from the hydrothermal treatment of  $\text{AlSi}_6$  at 150 °C in the presence of HCl (12 eq.).
9. **Fig. S9**  $^1\text{H}$  NMR spectra of the soluble products obtained from the refluxing and hydrothermal treatment of  $\text{AlSi}_6$  at 150 °C in the presence of HCl (12 eq.).
10. **Fig. S10**  $^1\text{H}$  NMR spectra of the products obtained from the refluxing of  $\text{AlSi}_6$  in the presence of KOH (12 eq.).
11. **Fig. S11** PXRD pattern of the product obtained from the refluxing of  $\text{AlSi}_6$  in the presence of KOH (12 eq.).
12. **Fig. S12**  $^1\text{H}$  NMR spectrum of a mixture of pyridine and benzene.
13. **Fig. S13**  $^1\text{H}$  NMR spectrum of the soluble product in  $\text{CD}_2\text{Cl}_2$  obtained from the hydrothermal treatment of  $\text{AlSi}_6$  in the presence of KOH (12 eq.) at 160 °C.
14. **Fig. S14** PXRD pattern of the amorphous solid obtained from the hydrothermal treatment of  $\text{AlSi}_6$  in the presence of KOH (24 eq.) at 160 °C.

15. **Fig. S15** SEM images of the obtained zeolites W and L from the hydrothermal treatment of **AlSi<sub>6</sub>** in the presence of KOH (6 or 9 eq.) at 160 °C.
16. **Fig. S16** <sup>1</sup>H NMR spectrum of the soluble product in CD<sub>2</sub>Cl<sub>2</sub> obtained from the hydrothermal treatment of **AlSi<sub>6</sub>** in the presence of KOH (3 eq.) at 160 °C.
17. **Fig. S17** PXRD patterns of the samples obtained from the control experiments using typical Al and Si sources.
18. **Fig. S18** TG-DTA diagrams of zeolites L and W synthesized from **AlSi<sub>6</sub>**.
19. **Fig. S19** PXRD patterns of the zeolite L obtained from the hydrothermal treatment of **AlSi<sub>6</sub>** in the presence of KOH (3 eq.) at 180 and 200 °C.
20. **Fig. S20** PXRD patterns of the zeolite W and megakalsilite obtained from the hydrothermal treatment of **AlSi<sub>6</sub>** in the presence of KOH (6 or 9 eq.) at 180 °C.
21. **Fig. S21** PXRD patterns of the zeolites L, W, and kalsilite obtained from the hydrothermal treatment of **AlSi<sub>6</sub>** in the presence of KOH (6 or 9 eq.) at 200 °C.
22. **Fig. S22** PXRD patterns of the megakalsilite and kalsilite obtained from the hydrothermal treatment of **AlSi<sub>6</sub>** in the presence of KOH (12 eq.) at 180 and 200 °C.
23. **Fig. S23** SEM images of the megakalsilite and kalsilite obtained from the hydrothermal treatment of **AlSi<sub>6</sub>** in the presence of KOH (12 eq.) at 180 and 200 °C.
24. **Fig. S24** PXRD patterns of the megakalsilite obtained from the hydrothermal treatment of **AlSi<sub>6</sub>** in the presence of KOH (24 eq.) at 180 and 200 °C.

25. **References**

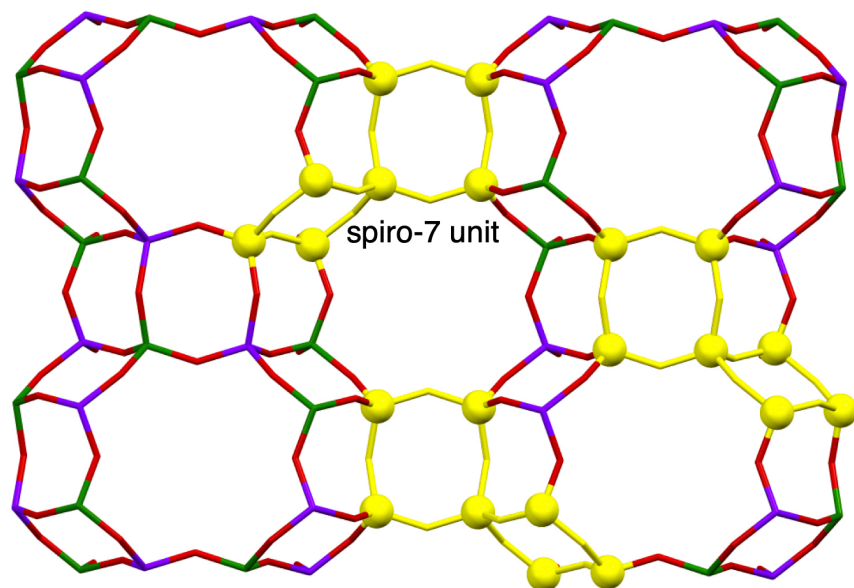

**Fig. S1** Spiro-7 unit (yellow) in the MER-type structure. Color code: red = O; purple = Al; green = Si. The Si/Al ratio of the structure equals 1, and  $K^+$  ions are omitted for clarity.

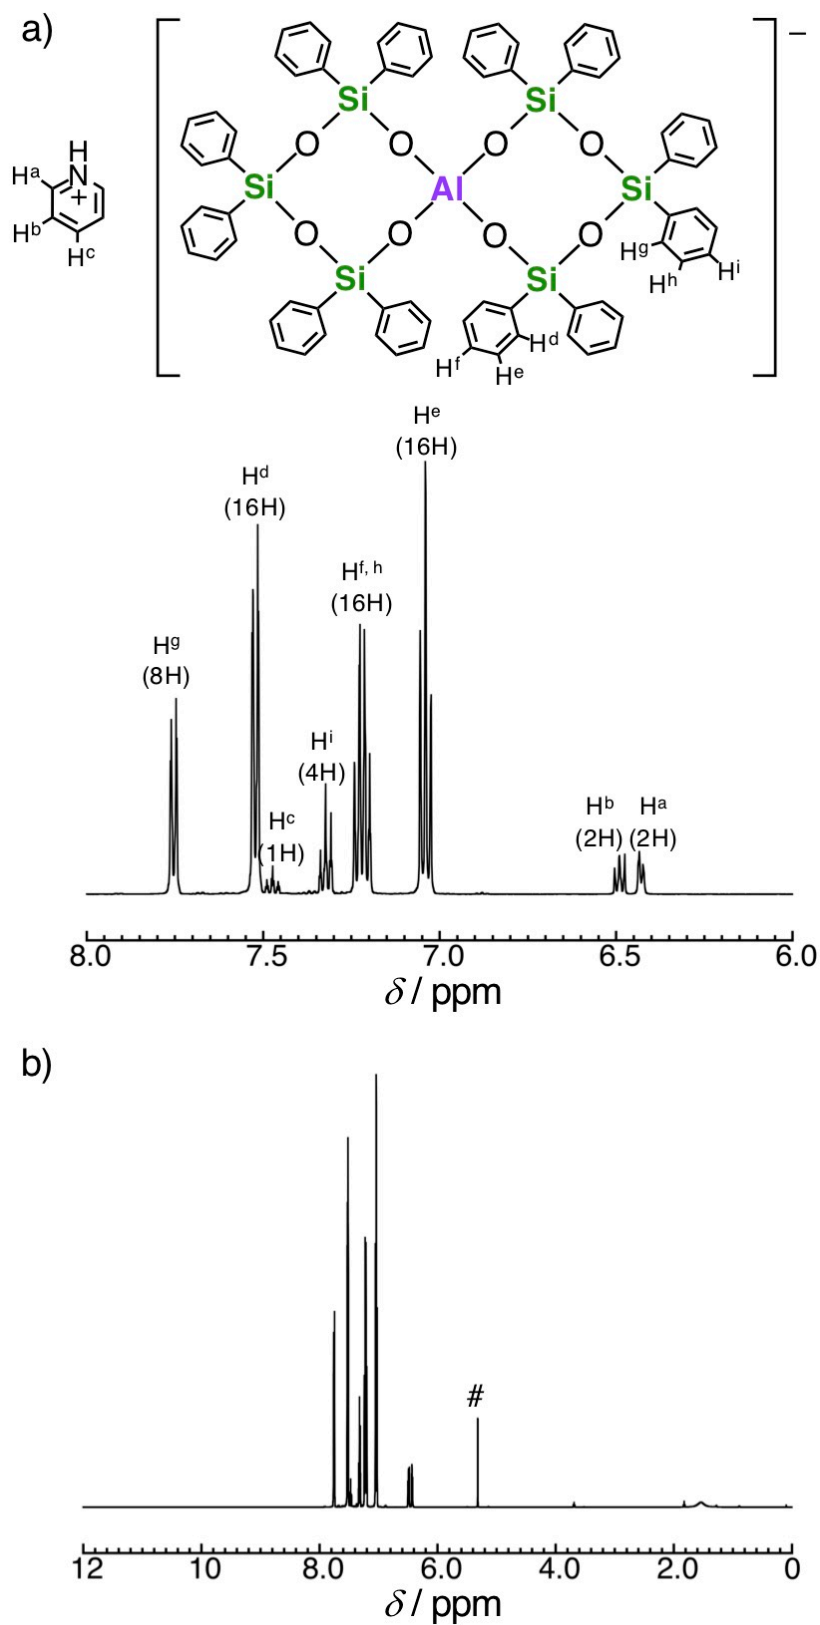

**Fig. S2** a) Aromatic region and b) full range of the  $^1\text{H}$  NMR (500 MHz,  $\text{CD}_2\text{Cl}_2$ ) spectra of  $\text{AlSi}_6$ . A symbol “#” denotes the residual proton of dichloromethane.

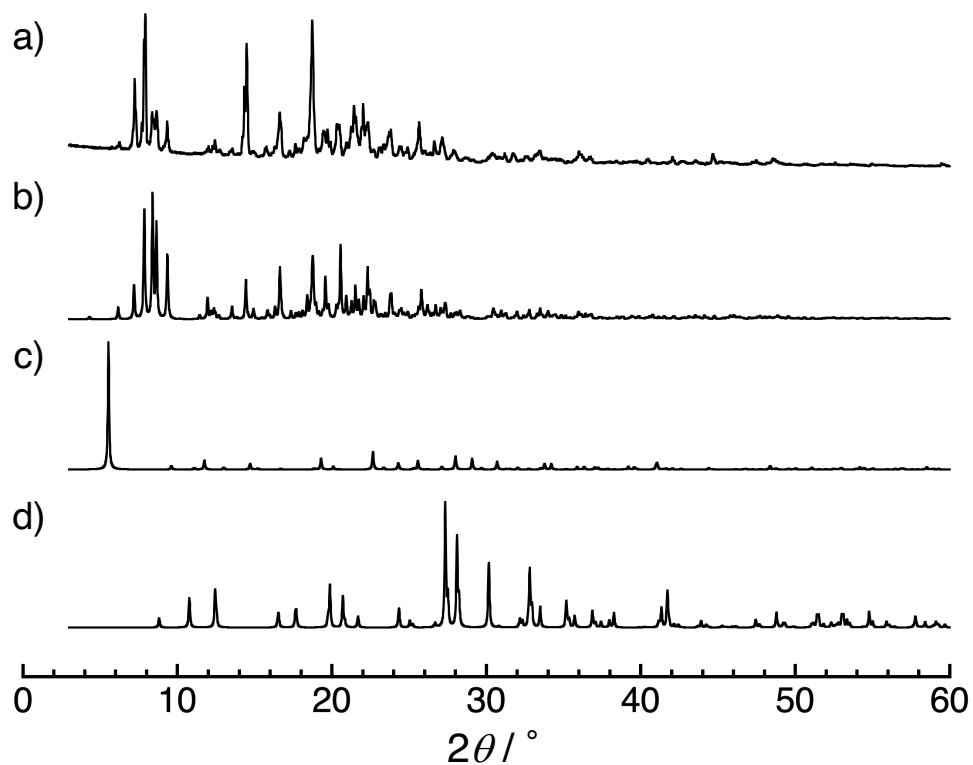

**Fig. S3** PXRD pattern of a) the synthesized  $\text{AlSi}_6$  and the simulated patterns for b)  $\text{AlSi}_6$ , c) zeolite  $\text{L}^{\text{S1}}$ , and d)  $\text{W}^{\text{S2}}$

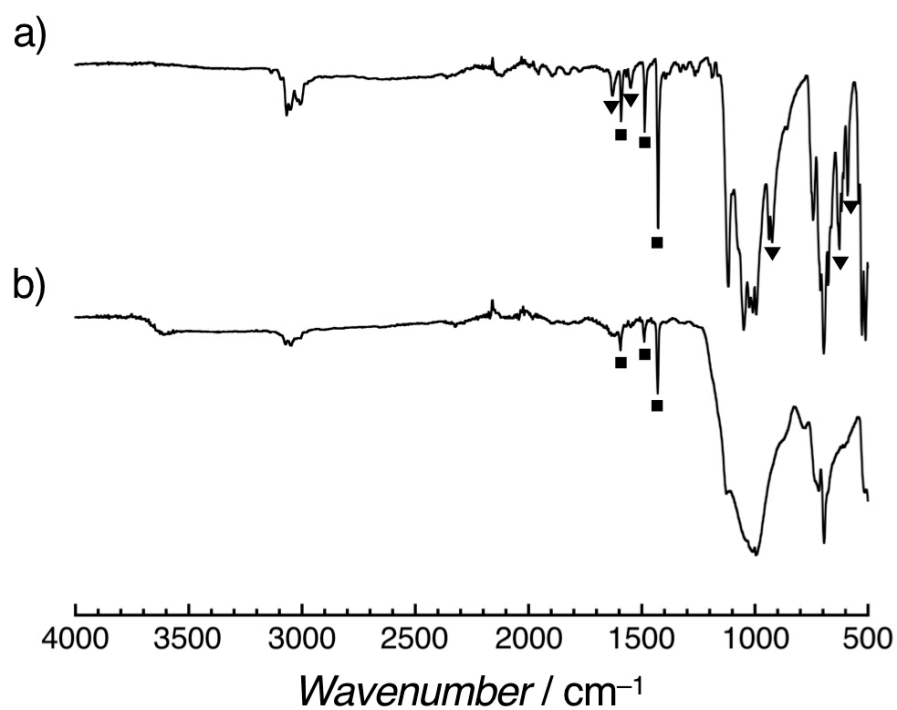

**Fig. S4** IR spectra of a) AlSi<sub>6</sub> and b) the samples obtained from TG measurements at 180 °C. The symbols “▼” and “■” mark absorption bands assignable to pyridinium and phenyl group, respectively.

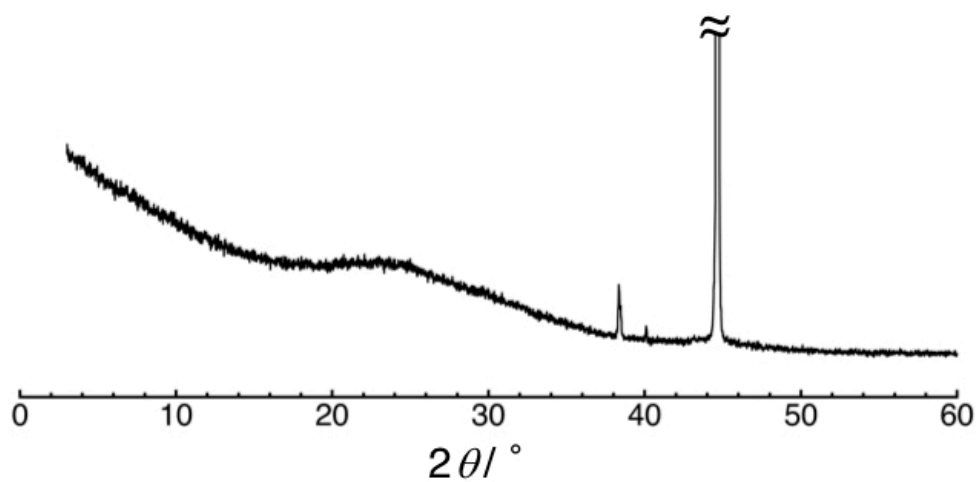

**Fig. S5** PXRD pattern of the sample obtained from the heating  $\text{AlSi}_6$  to 800 °C under an  $\text{N}_2$  atmosphere. The diffractions peaks at 38.3, 40.1, and 44.6° are originated from the Al pan used as a sample holder.



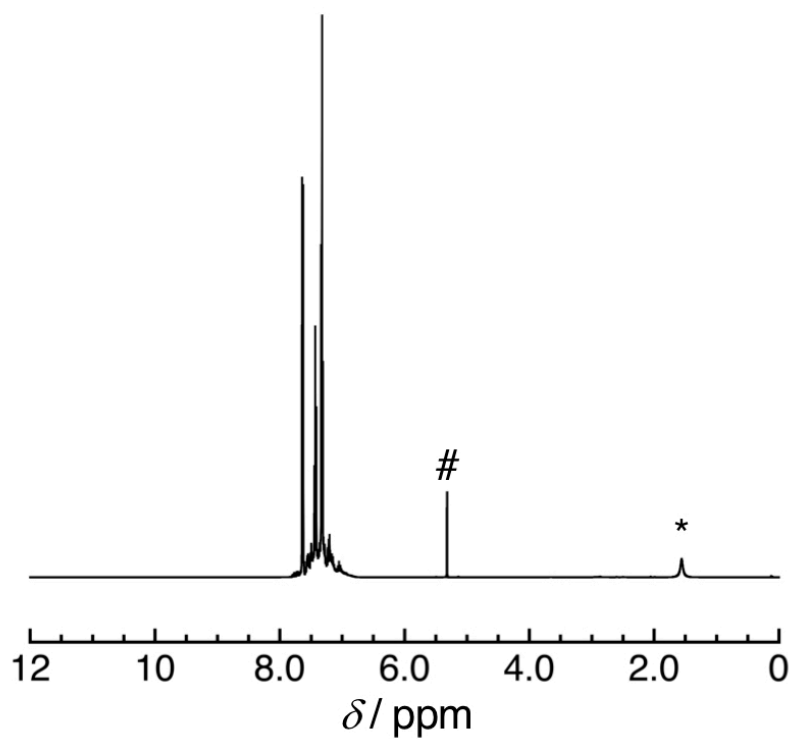

**Fig. S6**  $^1\text{H}$  NMR (500 MHz,  $\text{CD}_2\text{Cl}_2$ ) spectrum of the product in the solution phase obtained from refluxing  $\text{AlSi}_6$  in aqueous  $\text{HCl}$  (12 eq.) for 12 h. The symbols “#” and “\*” denote the residual proton of dichloromethane and protons of  $\text{Si-OH}$  and/or  $\text{H}_2\text{O}$ , respectively.

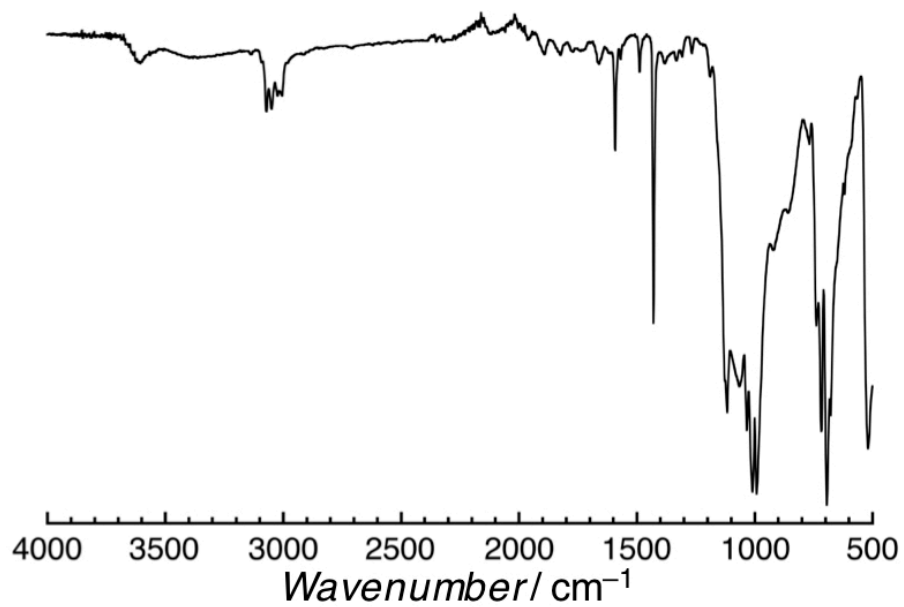

**Fig. S7** IR spectrum of the products in the solution phase obtained from the hydrothermal treatment of  $\text{AlSi}_6$  at 150 °C for 12 h in the presence of HCl (12 eq.).

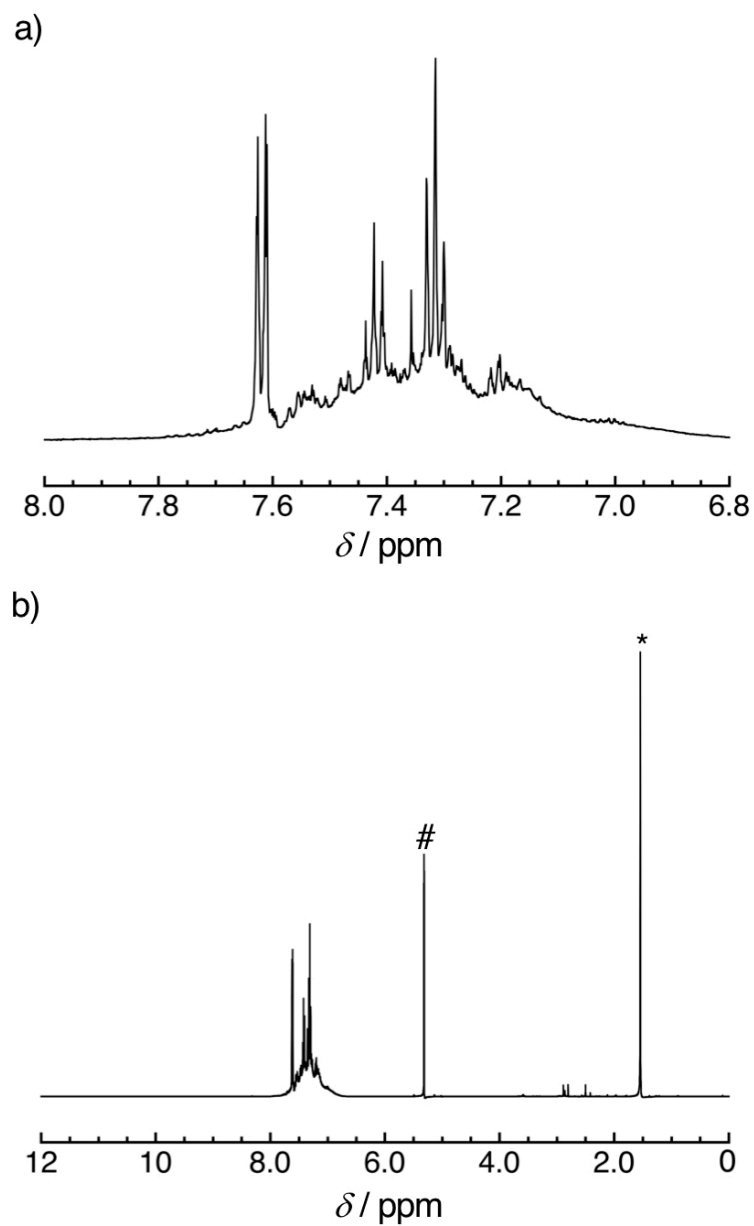

**Fig. S8** a) Aromatic region and b) full range of the  $^1\text{H}$  NMR (500 MHz,  $\text{CD}_2\text{Cl}_2$ ) spectrum of the product in the solution phase obtained from the hydrothermal treatment of  $\text{AlSi}_6$  at 150 °C for 12 h in aqueous HCl (12 eq.). The symbol # denote the residual proton of dichloromethane and protons, and the signal \* denotes  $\text{Si-OH}$  and/or  $\text{H}_2\text{O}$ .

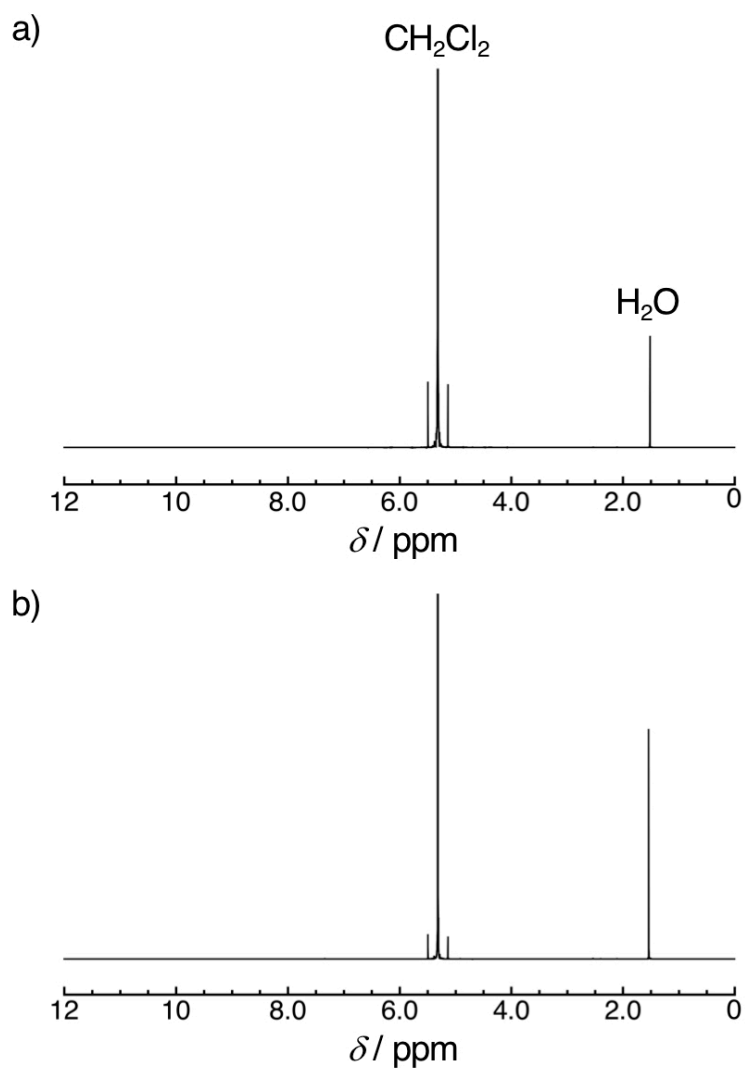

**Fig. S9**  $^1\text{H}$  NMR spectra (500 MHz,  $\text{CD}_2\text{Cl}_2$ ) of the products in the solution phase obtained from a) refluxing and b) the hydrothermal treatment of  $\text{AlSi}_6$  at 150 °C for 12 h in the presence of HCl (12 eq.).

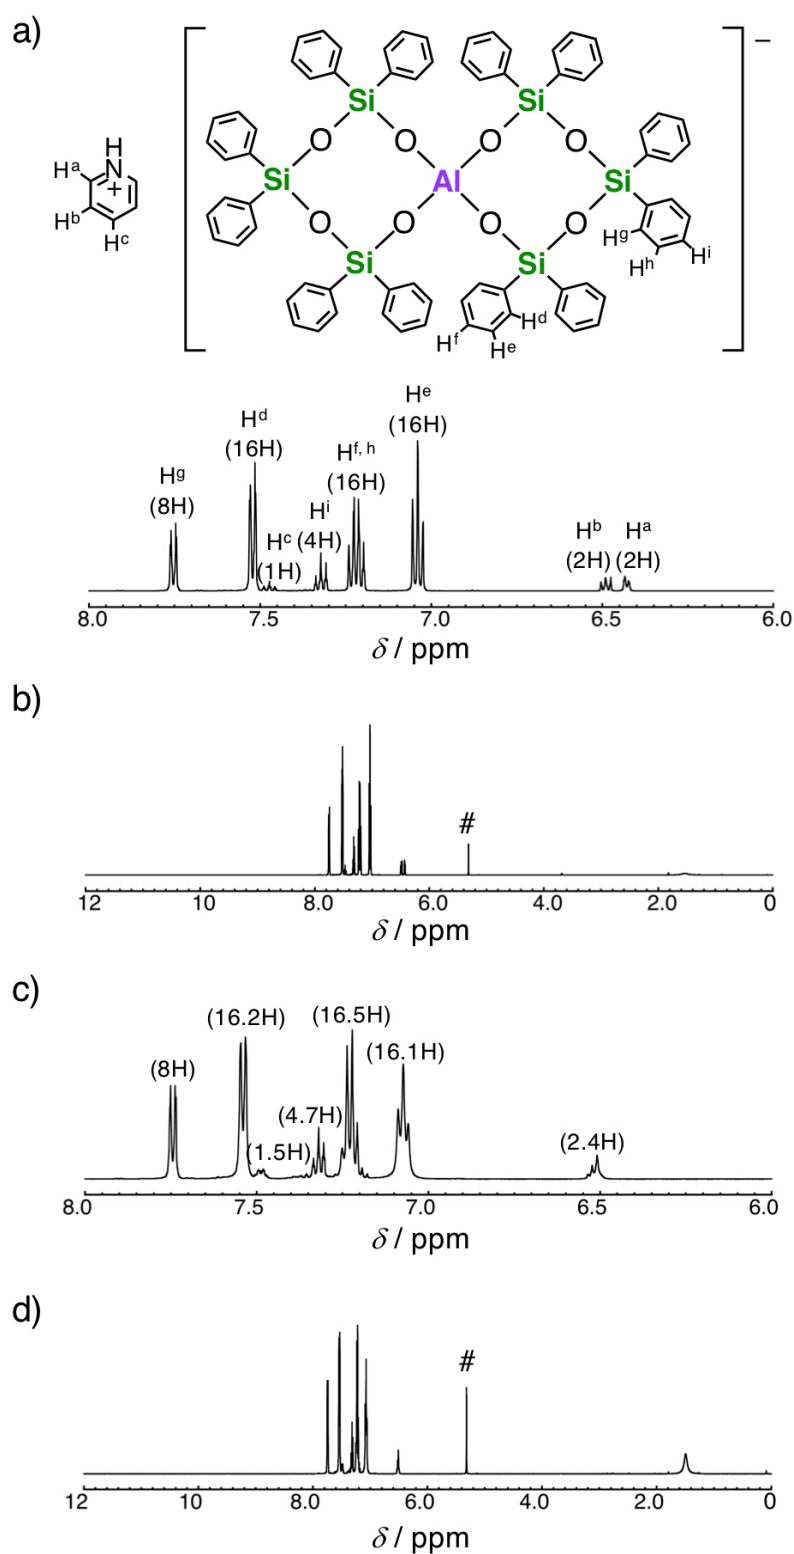

**Fig. S10** Aromatic region and full range of the  $^1\text{H}$  NMR spectra (500 MHz,  $\text{CD}_2\text{Cl}_2$ ) of a, b)  $\text{AlSi}_6$  and c, d) the soluble products obtained from the refluxing of  $\text{AlSi}_6$  for 12 h in aqueous KOH (12 eq.). The symbol “#” denotes the residual proton of dichloromethane.

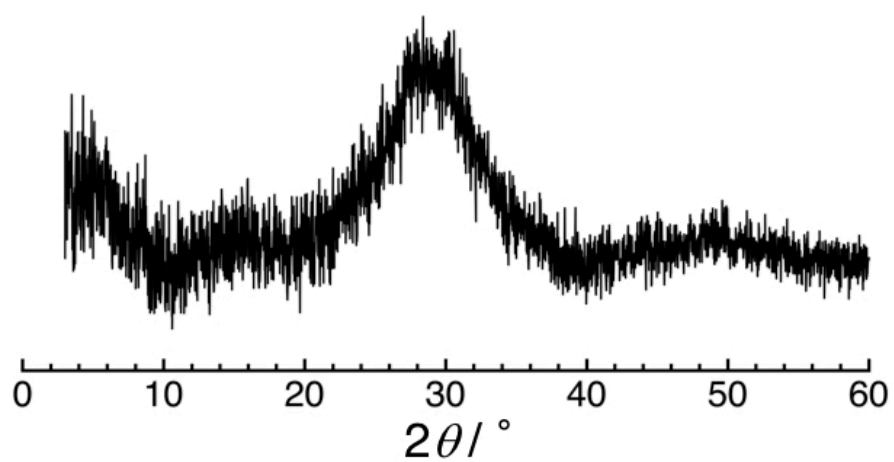

**Fig. S11** PXRD pattern of the product obtained from the refluxing of  $\text{AlSi}_6$  in aqueous KOH (12 eq.) for 12 h.

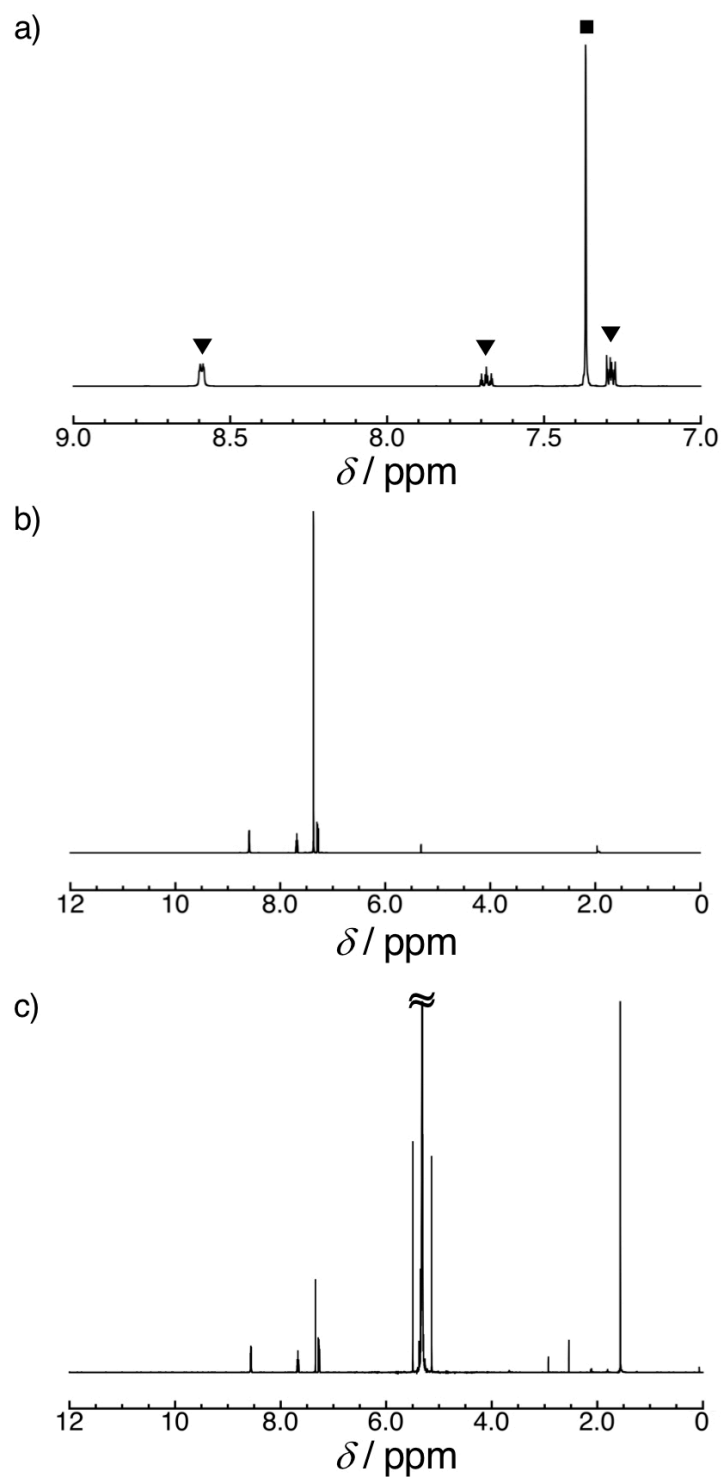

**Fig. S12** a) Aromatic region and b) full range of the  $^1\text{H}$  NMR (500 MHz,  $\text{CD}_2\text{Cl}_2$ ) spectrum of a mixture of pyridine and benzene for reference, and c) full range spectrum of the soluble product in  $\text{CD}_2\text{Cl}_2$  obtained from hydrothermal treatment of  $\text{AlSi}_6$  in the presence of KOH (12 eq.) at 150 °C for 12 h. The symbols ▼ and ■ denote signals from pyridine and benzene, respectively.

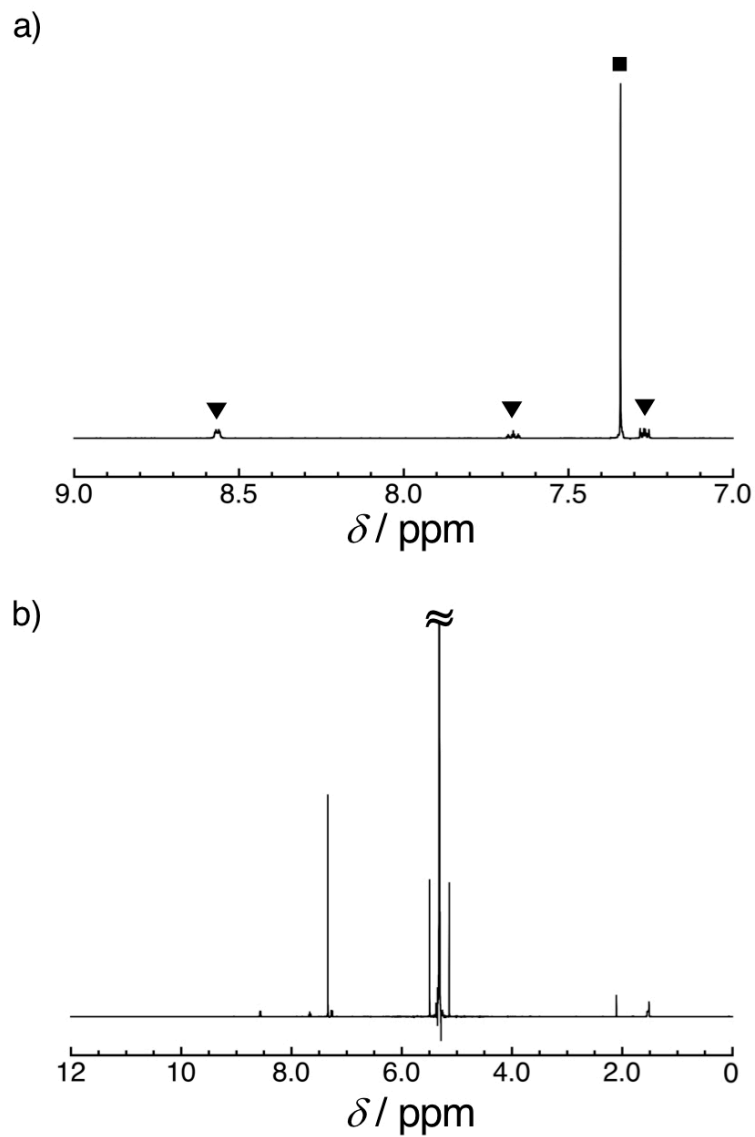

**Fig. S13** a) Aromatic region and b) full range of the <sup>1</sup>H NMR (500 MHz) spectrum of the soluble product in CD<sub>2</sub>Cl<sub>2</sub> obtained from the hydrothermal treatment of AlSi<sub>6</sub> in the presence of KOH (12 eq.) at 160 °C for 12 h. The symbols ▼ and ■ denote signals from pyridine and benzene, respectively.



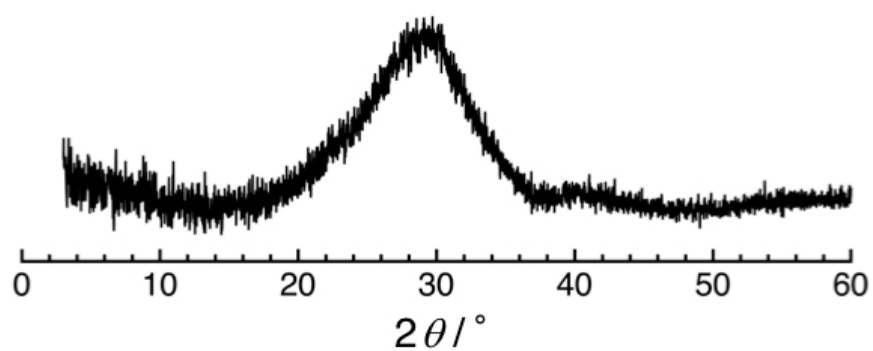

**Fig. S14** PXRD pattern of the amorphous solid obtained from the hydrothermal treatment of  $\text{AlSi}_6$  in the presence of KOH (24 eq.) at  $160^\circ\text{C}$ .

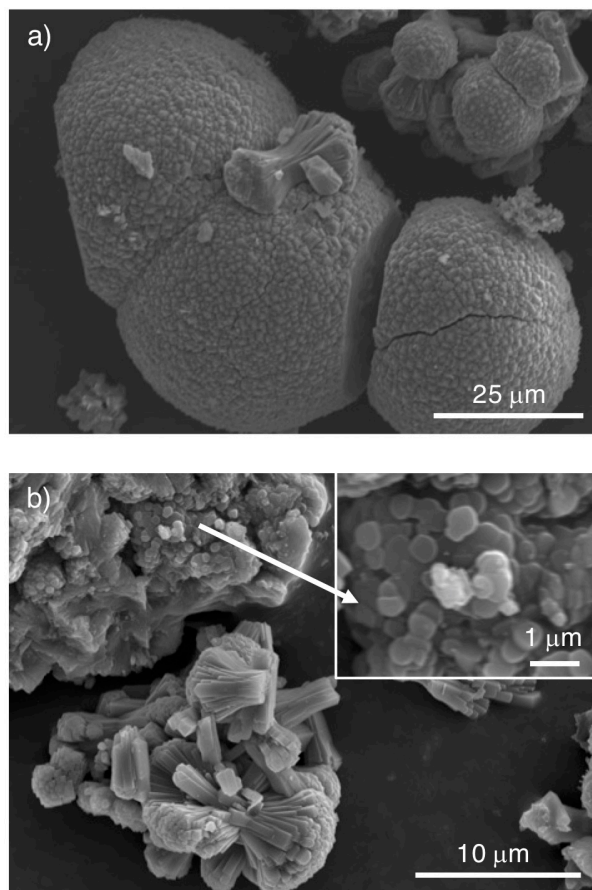

**Fig. S15** SEM images of a) zeolite W and b) a mixture of zeolite W and L obtained from the hydrothermal treatment of  $\text{AlSi}_6$  in the presence of KOH ( $x$  eq.) at 160 °C (a)  $x = 9$  and b)  $x = 6$ . Inset in b) shows closed up image of disk-shaped crystals of zeolite L.

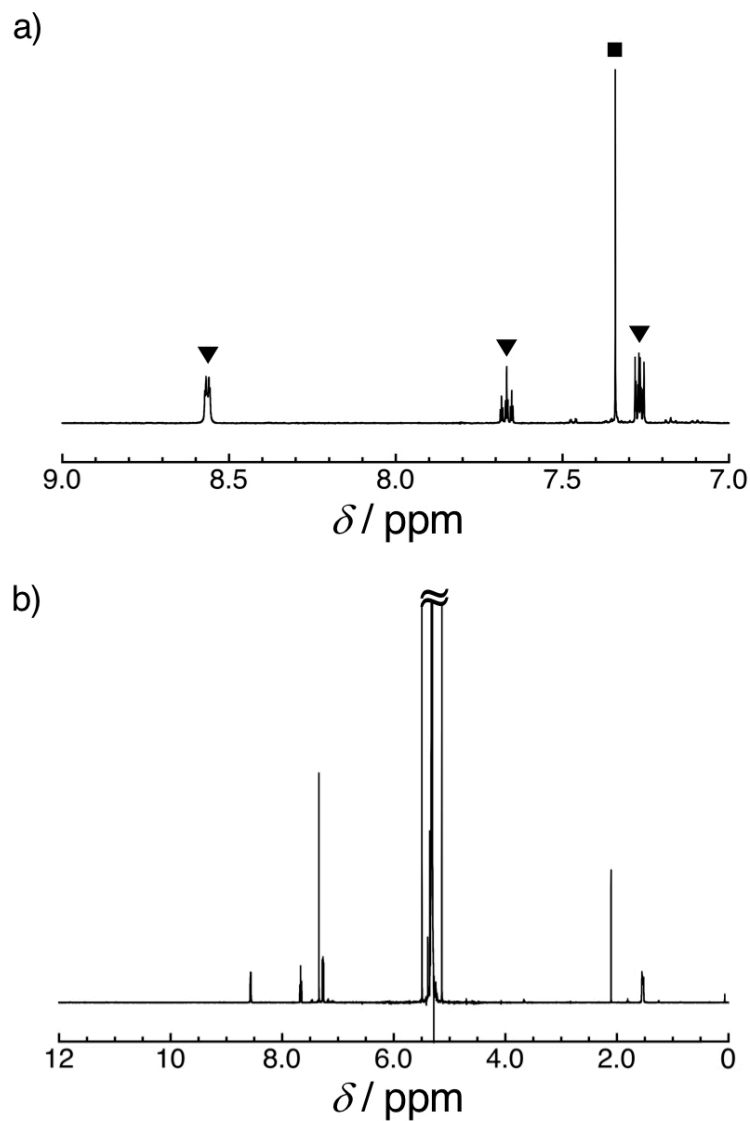

**Fig. S16** a) Aromatic region and b) full range of the  $^1\text{H}$  NMR (500 MHz) spectrum of the soluble product in  $\text{CD}_2\text{Cl}_2$  obtained from the hydrothermal treatment of  $\text{AlSi}_6$  in the presence of KOH (3 eq.) at 160 °C for 12 h. The symbols ▼ and ■ denote signals from pyridine and benzene, respectively.

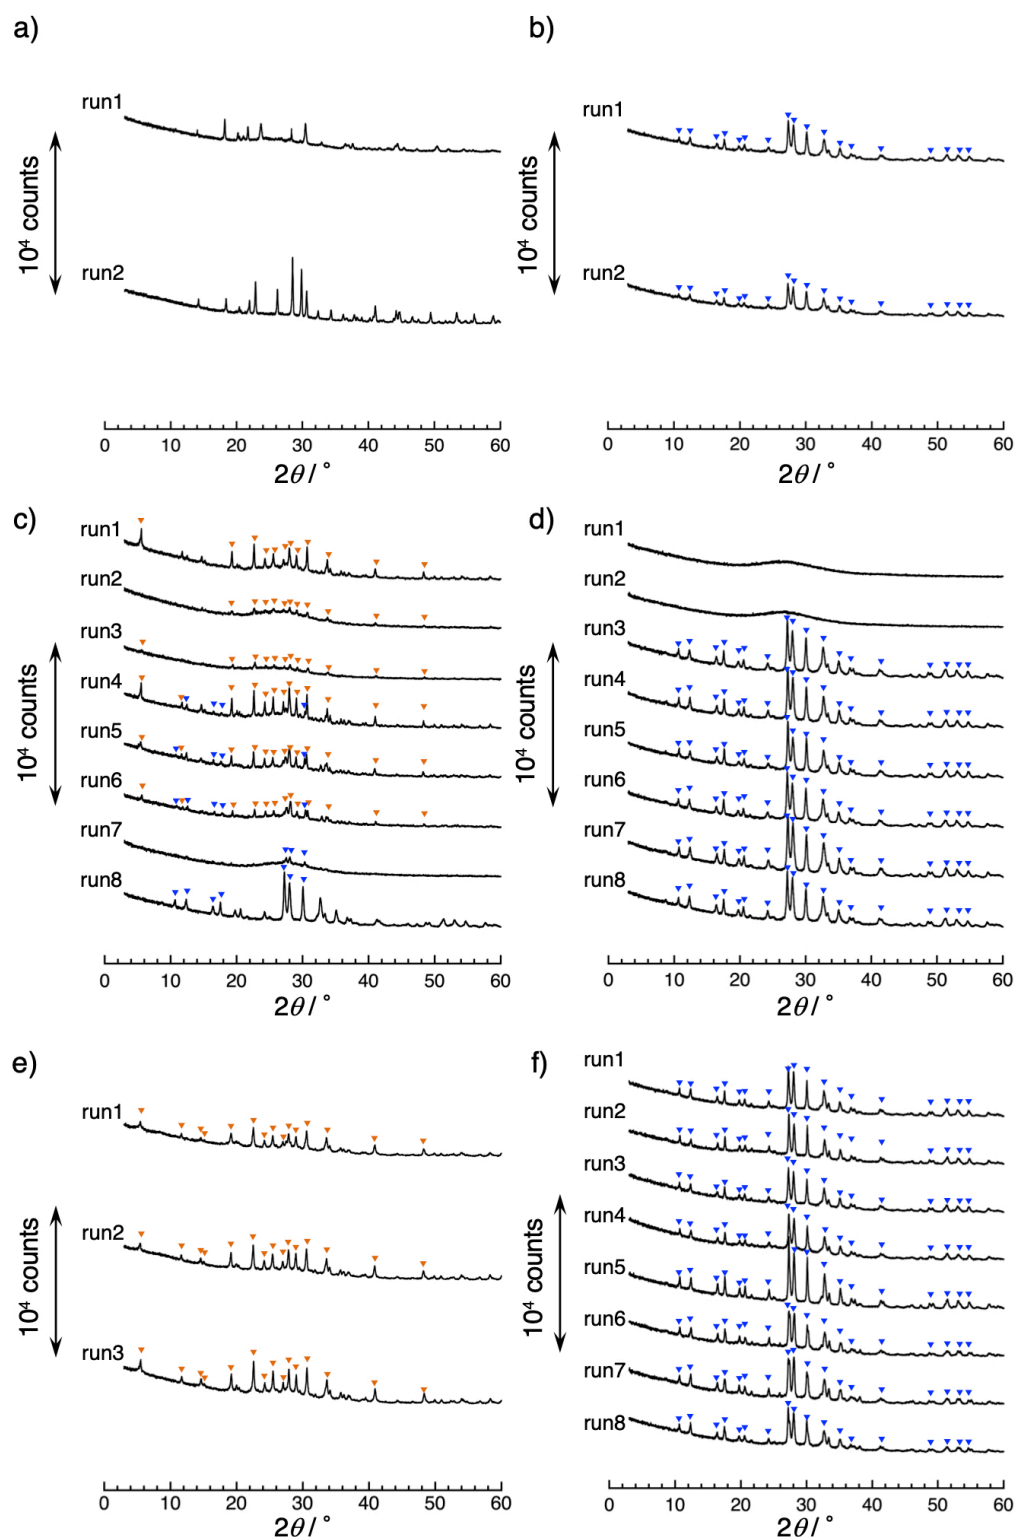

**Fig. S17** PXRD patterns of powders synthesized from a)  $\text{Al}(\text{OH})_3$ ,  $\text{SiO}_2$ , and 3 eq. KOH; b)  $\text{Al}(\text{OH})_3$ ,  $\text{SiO}_2$ , and 12 eq. KOH; c) Al,  $\text{SiO}_2$ , and 3 eq. KOH; d) Al,  $\text{SiO}_2$  and 12 eq. KOH; e)  $\text{AlSi}_6$  and 3 eq. KOH; f)  $\text{AlSi}_6$  and 12 eq. KOH. All reactions were carried out for 12 h at 160 °C. All measurements were performed using the following conditions: scan rate = 5 °/min; step = 0.02 °; at room temperature. The symbols “▼” and “▼” indicate peaks derived from zeolites L and W, respectively.

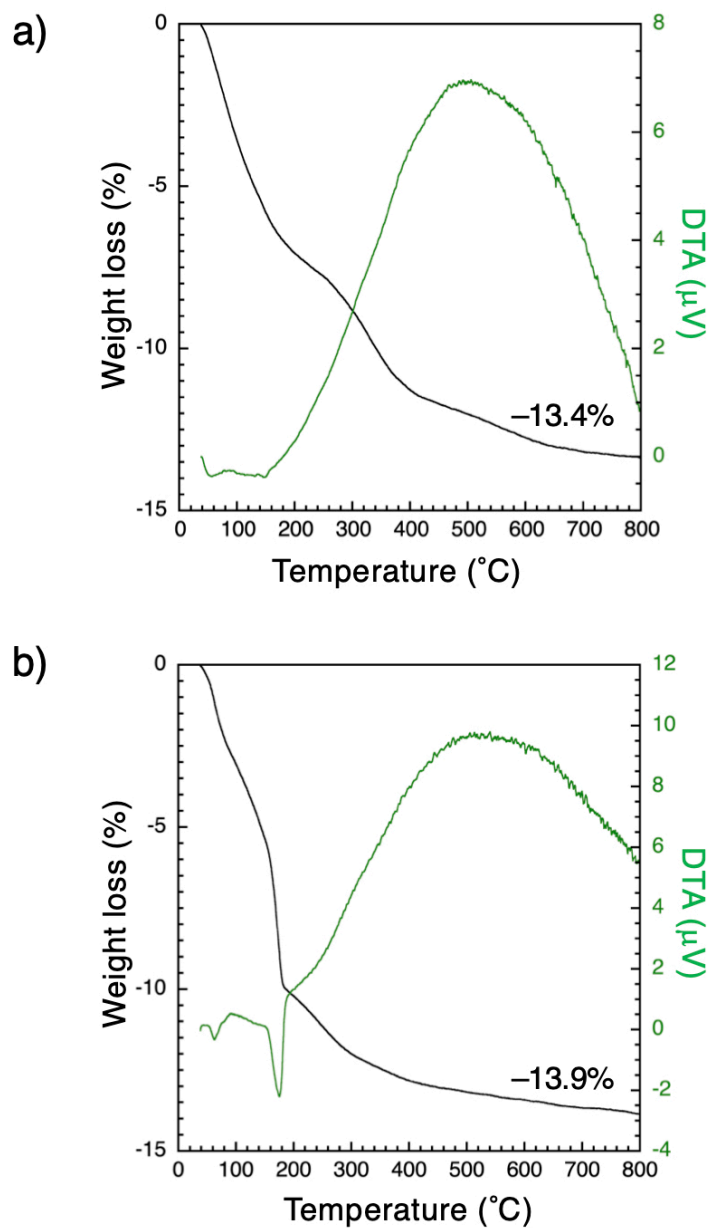

**Fig. S18** TG (black line)-DTA (green line) diagrams of a) zeolites L and b) W synthesized from  $\text{AlSi}_6$  in the presence of 3 or 12 eq. of KOH at 160 °C for 12 h, respectively.

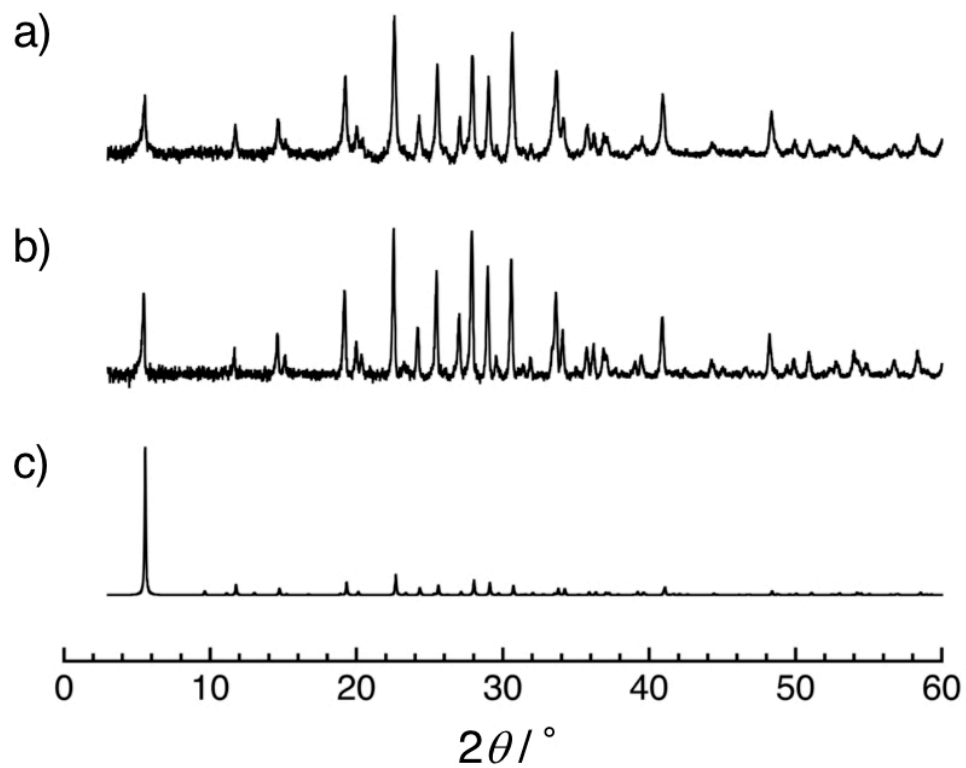

**Fig. S19** PXRD patterns of the zeolite L obtained from the hydrothermal treatment of  $\text{AlSi}_6$  in the presence of KOH (3 eq.) at a) 180 and b) 200 °C. c) The simulated PXRD pattern of zeolite L.<sup>S1</sup>

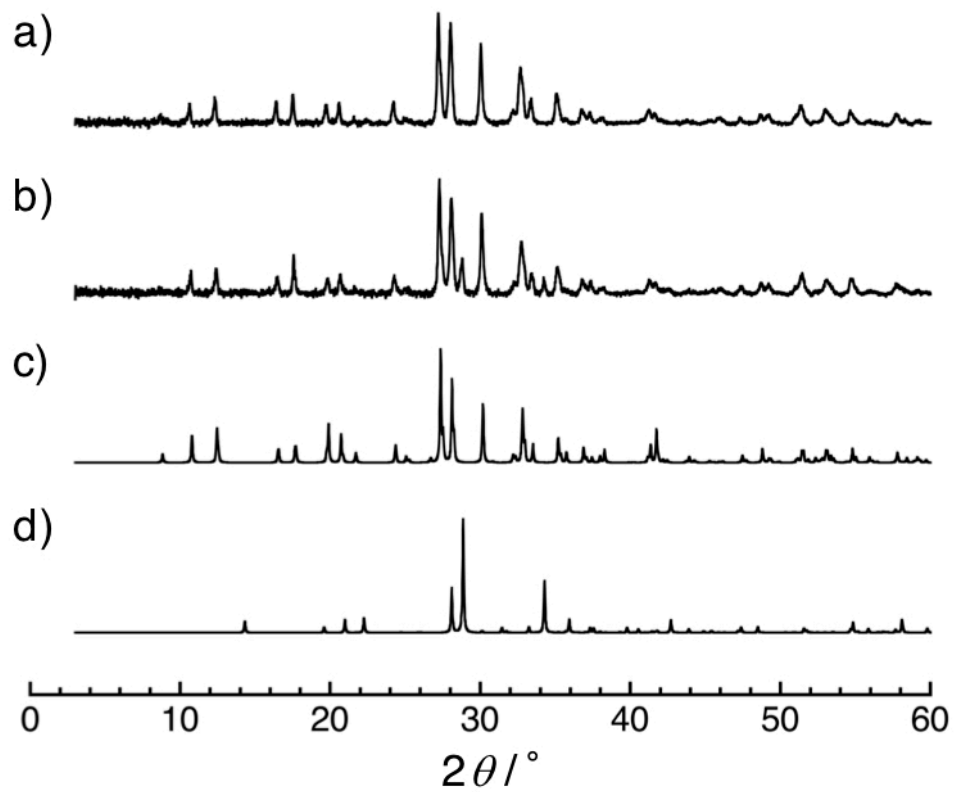

**Fig. S20** PXRD patterns of the mixture of zeolite W and megakalsilite obtained from the hydrothermal treatments of  $\text{AlSi}_6$  in the presence of KOH ( $x$  eq.) at 180 °C (a)  $x = 6$  and b)  $x = 9$ ). Simulated PXRD patterns for c) zeolite W<sup>S2</sup> and d) megakalsilite.<sup>S3</sup>

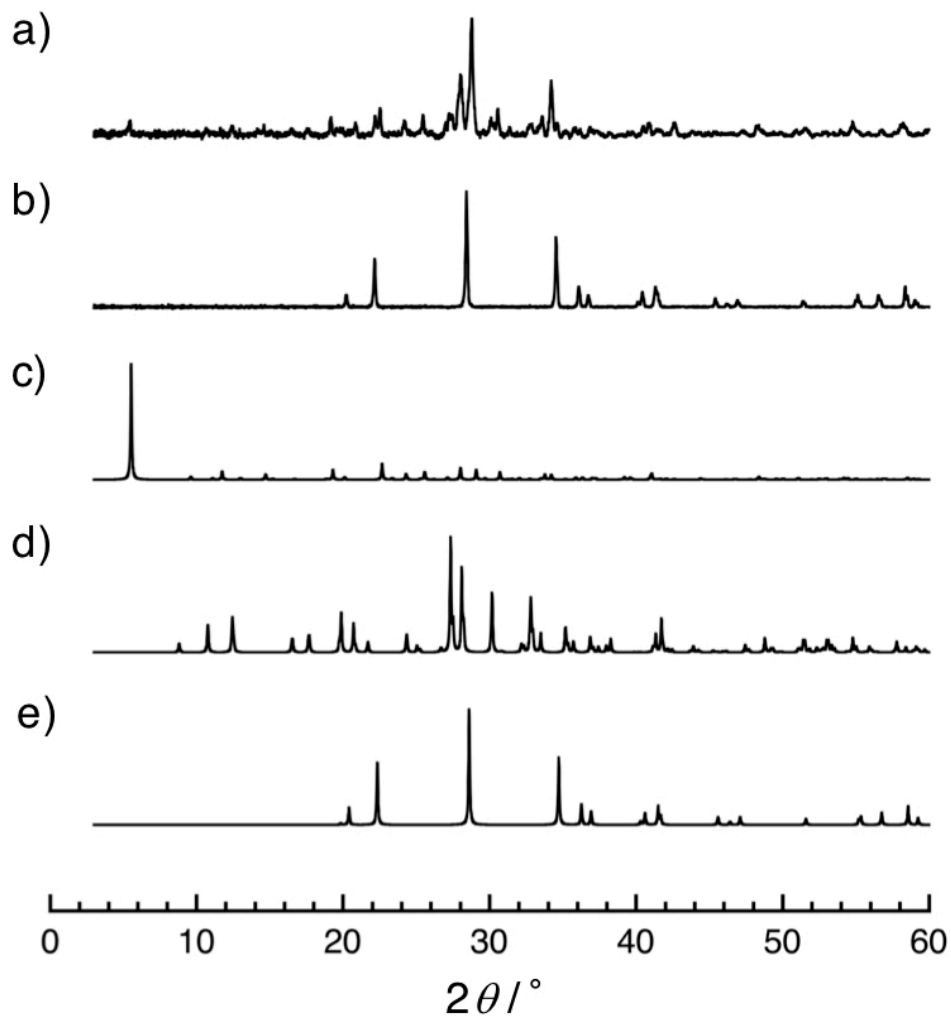

**Fig. S21** PXRD patterns of zeolites L, W, and kalsilite obtained from the hydrothermal treatments of  $\text{AlSi}_6$  in the presence of KOH ( $x$  eq.) at 200 °C (a)  $x = 6$  and b)  $x = 9$ ). Simulated PXRD patterns for c) zeolite L,<sup>S1</sup> d) zeolite W,<sup>S2</sup> and e) kalsilite.<sup>S4</sup>



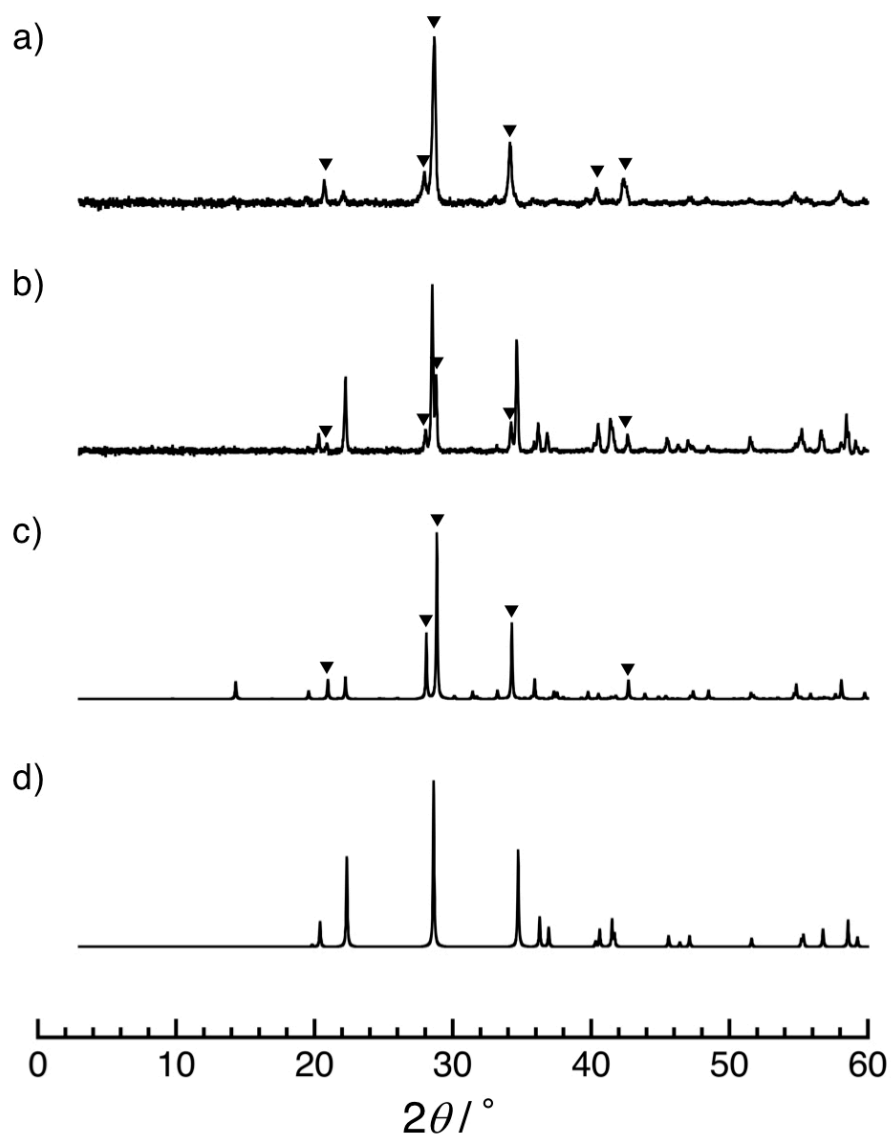

**Fig. S22** PXRD patterns of the megakalsilite and kalsilite obtained from the hydrothermal treatment of  $\text{AlSi}_6$  in the presence of KOH 12 eq. at a) 180 and b) 200 °C. Simulated PXRD patterns for c) megakalsilite<sup>S3</sup> and d) kalsilite.<sup>S4</sup> The signal “▼” denotes characteristic diffraction peaks for megakalsilite.

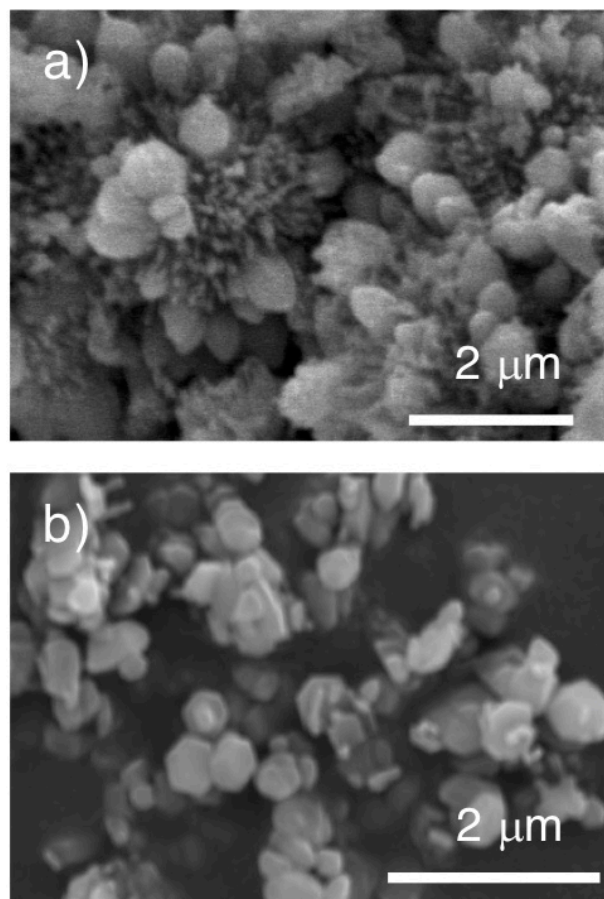

**Fig. S23** SEM images of a) kalsilite and b) megakalsilite obtained from the hydrothermal treatments of  $\text{AlSi}_6$  in the presence of KOH (12 eq.) at a) 180 and b) 200 °C.

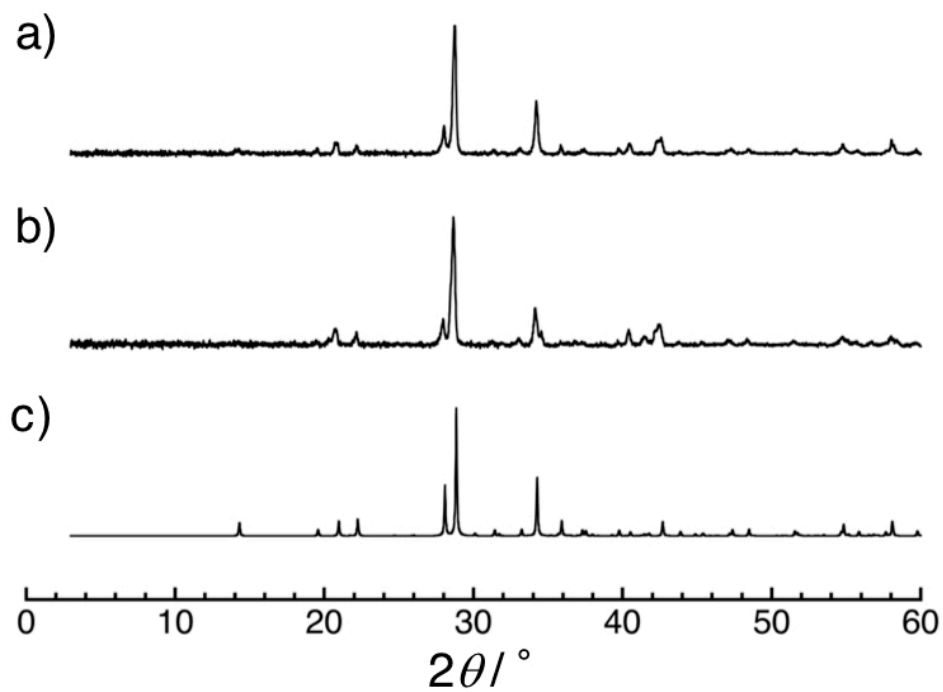

**Fig. S24** PXRD patterns of the megakalsilite obtained from the hydrothermal treatments of  $\text{AlSi}_6$  in the presence of KOH (24 eq.) at a) 180 and b) 200 °C. c) Simulated PXRD patterns for megakalsilite.<sup>S3</sup>

## References

- S1. A. Z. Ruiz, D. Brühwiler, T. Ban and G. Calzaferri, *Monatsh. Chem.*, 2005, **136**, 77–89.
- S2. W. Yao, R. Li, H. Jiang and D. Han, *J. Org. Chem.*, 2018, **83**, 2250–2255.
- S3. A. P. Khomyakov, G. N. Nechelyustov, E. Sokolova, E. Bonaccorsi, S. Merlino and M. Pasero, *Can. Mineral.*, 2002, **40**, 961–970.
- S4. A. J. Perrotta and J. V. Smith, *Mineral. Mag.*, 1965, **35**, 588–595.
